# Supplementary material for: A Novel Gammapartitivirus That Causes Changes in Fungal Development and Multi-Stress Tolerance to Important Medicinal Fungus Cordyceps chanhua
Source: MDPI journal article supplement (doi:10.3390/jof8121309), 2022-12-16
Supplement: s1 [file s1]

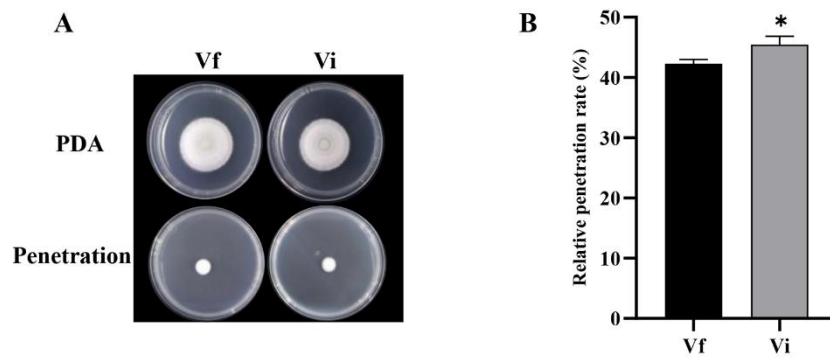

**Figure S2.** Penetration determination of Vf and Vi strains. (A) Colony morphology of Vf and Vi strains on PDA and after removing cicada wings. (B) Relative penetration rate of strains Vf and Vi growing on PDA affixed with cicada wings. \*  $p < 0.05$ .
