# Supplementary material for: A Novel Gammapartitivirus That Causes Changes in Fungal Development and Multi-Stress Tolerance to Important Medicinal Fungus Cordyceps chanhua
Source: MDPI journal article supplement (doi:10.3390/jof8121309), 2022-12-16
Supplement: s1 [file s1]

|          | III            | IV             | V                             | VI           | VII        | VIII     |
|----------|----------------|----------------|-------------------------------|--------------|------------|----------|
| GaRV-MS1 | PKTRLVWVYPAEML | GLDFSSFDTKVPS  | ILMPDGRMFRKRRGVPSGSWWTQMVDVVN | RVLGDDSAFRSP | FKLLGTTTYR | HRDTNEWF |
| CcPV1    | PKTRLVWVYPAEML | GLDFSSGFDTTVPA | ILMPDGRMFRKYRGVPSGSWWTQMVDVVN | KVLGDDSAFRSG | FKLLGARYR  | YRDTNEWF |
| AoV      | PKTRLVWVYPAEML | GLDFSSFDKVP    | ILMPDGRMFRKYRGVPSGSWWTQMVDVVN | RVLGDDSAFRSC | MKLLGTTTYR | HRDTNEWF |
| PsV-S    | PKTRLVWVYPAEML | GLDFSSGFDTKVPA | ILMPDGRMFRKYRGVPSGSWWTQMVDVVN | RVLGDDSAFRSC | FKLLGTTTYR | HRDTNEWF |
| DdV1     | PKTRLVWVYPAEML | GLDFSSFDKVP    | ILMPDGRMFRKYRGVPSGSWWTQMVDVVN | KVLGDDSAFRST | FKLLGTYR   | YRSTDEWF |
| DdV2     | PKTRLVWVYPAEML | GLDFSSFDKVP    | ILMPDGRMFRKYRGVPSGSWWTQMVDVVN | EVLGDDSAFRSN | FKLLGTYR   | HRSTDEWF |
| UvPV     | PKTRLVWVYPAEML | GLDFSSFDTKVPA  | ILMPDGRMFRKYRGVPSGSWWTQMVDVVN | RVLGDDSAFRSS | FKLLGTYR   | FRPTNEWF |
| MgPV1    | PKTRLVWVYPAEML | GLDFSSFDTKVPA  | ILMPDGRMFRKYRGVPSGSWWTQMVDVVN | KVLGDDSAFRSG | FKLLGTYR   | YRDEDEWF |
| VdPV1-o1 | PKTRLVWVYPAEML | GLDFSSFDTKVPA  | ILMPDGRMFRKYRGVPSGSWWTQMVDVVN | RVLGDDSAFCSG | FKLLGTTTYR | FRDTNEWF |
| CtParV1  | PKTRLVWVYPAEML | GLDFSSFDTKVPA  | ILMPDGRMFRKYRGVPSGSWWTQMVDVVN | RVLGDDSAFRSG | FKLLGTYR   | FRDTNEWF |
| MbPV2    | PKTRLVWVYPAEML | GLDFSSFDTKVPA  | ILMPDGRMFRKYRGVPSGSWWTQMVDVVN | RVLGDDSAFRSG | FKLLGTYR   | YRATDEWF |
| AfuPV-1  | PKTRLVWVYPAEML | GLDFSSFDARVPA  | ILMPDGRMFRKYRGVPSGSWWTQMVDVVN | RVLGDDSAFRSG | FKLLGTTTYR | HRPTNEWF |
| OPV1     | PKTRLVWVYPAEML | GLDFSSFDTKVPP  | ILMPDGRMFRKYRGVPSGSWWTQMVDVVN | KVLGDDSAFVSG | FKLLGTYR   | YRPTLEWF |
| FusoV    | PKTRLVWVYPAEML | GLDFSSFDTKVPA  | ILMPDGRMFRKRRGVPSGSWWTQLVDVVN | RVLGDDSAFMAA | LKLLGVYR   | FRTEDEWF |
|          | **** *;***     | *;***; **;     | ***** *****; *;: ****         | .*****; :    | :****; *;  | . * **   |

**Figures S1:** Alignment of RdRp sequences between CcPV1 and other members of *Partitiviridae*. CcPV1 (Cordyceps chanhua partitivirus 1), GaRV-MS1 (Gremmeniella abietina RNA virus; MS1AAM12240.1), AoV (Aspergillus ochraceus virus; ABV30675.1), PsV-S (Penicillium stoloniferum virus S; YP\_052856.2), DdV1 (Discula destructiva virus 1; AAG59816.1), DdV2 (Discula destructiva virus 2; AAK59379.1), UvPV (Ustilagoidea vires partitivirus; AGO04402.1), MgPV (Magnaporthe grisea partitivirus 1; AZT88596.1), VdPV1-o1 (Verticillium dahliae partitivirus 1; YP\_009164038.1), CtParV1 (Colletotrichum truncatum partitivirus 1; ALF46547.1), MbPV2 (Metarhizium brunneum partitivirus 2), AfuPV-1 (Aspergillus fumigatus partitivirus 1; CAY25801.2), OPV1 (Ophiostoma partitivirus 1; CAJ31886.1), FusoV (Fusarium solani virus 1; BAA09520.1)
